# Supplementary material for: Transcriptome Analysis and Identification of a Female-Specific SSR Marker in Pistacia chinensis Based on Illumina Paired-End RNA Sequencing
Source: MDPI journal article supplement (doi:10.3390/genes13061024), 2022-06-07
Supplement: s1 [file s1]

Table S2 Primers sequences of of 151 EST-SSR markers for *P. chinensis*

| Marker<br>ID | Foward<br>primer          | Reverse<br>primer        | Repeat<br>motif | Allele<br>size(bp) | Amplified<br>primer |
|--------------|---------------------------|--------------------------|-----------------|--------------------|---------------------|
| PcSSR1       | AGGCTTCAAAATCTTCCAATTC    | GGATAAAATATGTGGGCTTGGTT  | AAAAAT(4<br>)   | 156                | Yes                 |
| PcSSR2       | GAAACACATCACAAATTTCTGGGT  | TGTTGTAGGATTGCGTTATTGTG  | AAAAT(4)        | 150                | Yes                 |
| PcSSR3       | TCCTGCATTTTCTTTCATTTC     | GAAGAAGATACCCATCAACAAACA | AAAGA(4)        | 159                | Yes                 |
| PcSSR4       | AATGGAAAGAACAAAAGCAATGA   | CCAACATCCTAATCTTCCAGAAA  | AAAT(5)         | 143                | Yes                 |
| PcSSR5       | AAGTTGATGAGCTCACCCATAGA   | AAGATATGGAGGTTGTGTCCAGA  | AAC(6)          | 132                | Yes                 |
| PcSSR6       | AAACAAATCATCAAAACACACCC   | GGCTATCAAAACTTAGCACATCA  | AAG(12)         | 131                | Yes                 |
| PcSSR7       | CGAAAAGTCGTTTGATCCATAAG   | TGTCATCTCCAGATTTTGTCTTC  | AAG(6)          | 139                | Yes                 |
| PcSSR8       | CAGCGTTGAACTAACAAAATAA    | CCTCTCTTCATACTCTTCTTCCG  | AAG(7)          | 153                | Yes                 |
| PcSSR9       | AAGTAGGAGGGTCAAGAAAAGC    | TTTAATCCTCCCAACCTTTCAT   | AAGG(6)         | 131                | No                  |
| PcSSR10      | TTTCAAAGAGGATGAATGGTTTG   | TTTGAATCTTGATGCCTCACAG   | AAT(6)          | 149                | Yes                 |
| PcSSR11      | TTGCTTTAGTTTCAAGGACCAA    | AAACTTACATCAGTCAGCAAGCC  | AAT(7)          | 136                | Yes                 |
| PcSSR12      | AGAGCAATGCGCTCTAATAACAC   | GTCGAGATGGGTGATTTCTATTG  | AATC(5)         | 144                | Yes                 |
| PcSSR13      | TCAGTTCATAACATTCTGTCTCTTG | CCAAGACTGATAGCAGAATAAGGA | AC(8)           | 158                | Yes                 |
| PcSSR14      | GATTTGATCTCAGGAATCTCCTCT  | AGCAAAGAGGACATGAAAACCTGA | ACA(6)          | 157                | Yes                 |
| PcSSR15      | CTTGGCCTAGACAATGATTCTGA   | GTCTCTCTGCCTCCACCTCTAC   | ACC(6)          | 137                | Yes                 |
| PcSSR16      | CACACTCTCCACTGACAAAAC     | GGACCATGTGGTTAGGGATT     | ACC(8)          | 135                | Yes                 |
| PcSSR17      | CAACCAAACTCGATCGTTTC      | CACCTGAGGCTCACATGTCTT    | ACTGCC(4<br>)   | 141                | Yes                 |
| PcSSR18      | ACACAGACACAAACCCTTGAAAT   | ATTAGTGAGGCCAAACAGAGACA  | AG(11)          | 135                | Yes                 |
| PcSSR19      | AGCAAATAAGAGAAACAGGAGCC   | TGACTTCTCTCTTTCCCTAACC   | AG(12)          | 159                | Yes                 |
| PcSSR20      | TCTTCATGTCAATACAAAACGGA   | CAGAGGCACCAGAATCTCTTTTA  | AG(14)          | 143                | Yes                 |
| PcSSR21      | TTGGAGATATTGTGAGGTCTGC    | CACTCATTCCAACAACAGAGACA  | AG(8)           | 159                | Yes                 |
| PcSSR22      | GGAGGTAAAGTTGAAGCCAGAAC   | TGCTACAAGAACAAGGTCCTCTC  | AG(8)           | 158                | Yes                 |
| PcSSR23      | CATTACGTTCTGTCCCTGACTC    | CATATTAAATCCGTACAACCCCA  | AG(8)           | 153                | Yes                 |
| PcSSR24      | ATGCAGCAACTGGAGATGATAAG   | CGTTTCATTGCCTTCAAACTAA   | AG(9)           | 159                | Yes                 |
| PcSSR25      | ATGCAGATTGTTTGGTGTTCCTT   | ATATTATGGAGAAGCAGATGGCA  | AG(9)           | 151                | Yes                 |
| PcSSR26      | GAAGAAGAGGAGGAAGAATTTGG   | TACATTCTCACACGGGAACTTTT  | AGA(6)          | 152                | Yes                 |
| PcSSR27      | GAAGGTCAAGGACAAGATCCAT    | GATACGGATGTTAATCGCTGTC   | AGA(6)          | 141                | Yes                 |
| PcSSR28      | TGGTAGAGAGGGTTGAGAGTGA    | TCAAATGCTCCTTACCGTACCTA  | AGA(8)          | 144                | Yes                 |
| PcSSR29      | CGTTCCTGTTCTAAGGACTTCAA   | AAGAACTCACAGCAACCACAAC   | AGAAAG(4<br>)   | 151                | Yes                 |
| PcSSR30      | AATTTTGAAATTCGTTCTGTTG    | GCAAAAATCCTAATTTTCGTTTTC | AGAAGG(4<br>)   | 151                | Yes                 |
| PcSSR31      | ATGCGAAAAGTGTGTTAGCTTTTC  | CCAATCTTTACTACCCACTCCCT  | AGG(6)          | 158                | Yes                 |
| PcSSR32      | GGCAAAATTGGGTAGTGAAATTA   | AGTTGTAAGTGAAGAAACCTCG   | AGT(9)          | 148                | Yes                 |
| PcSSR33      | ATCACTATCGTCCAGCCAAGATA   | TCAAGAGTAACCAAGGTAGGCAG  | AT(10)          | 135                | No                  |
| PcSSR34      | CAGATGAAACAAAAATTCACACG   | GCTCAGATGAAACAAAAATTCACA | AT(11)          | 145                | No                  |
| PcSSR35      | AACAACTGTCCCATCAATCAGT    | GTTTCCTTGCTAACCAGCATTTA  | AT(13)          | 137                | Yes                 |
| PcSSR36      | TTGCCTGTTAAATGTTGAAGGAC   | ATGCAAGAAGAAGCACACCTAGT  | AT(8)           | 145                | Yes                 |
| PcSSR37      | CCATCTAAAACCATTAAGGTCCC   | TTACAGCTTCCATCTTTTTCAGC  | AT(8)           | 84                 | No                  |

|         |                          |                            |               |     |     |
|---------|--------------------------|----------------------------|---------------|-----|-----|
| PcSSR38 | TTCCGAAATTAAGTTGCTTCTCA  | AGATTGAACGAAGTGTGACTGGT    | AT(8)         | 145 | Yes |
| PcSSR39 | TTATGATTGCATGACATTCTTGG  | ATTCATGAGCAATCACCACCTTTT   | AT(9)         | 143 | Yes |
| PcSSR40 | TAATAGGCCGAGAGGTTGATCTT  | AAGAGTTGGGTGAAGTTTTAGGC    | AT(9)         | 118 | Yes |
| PcSSR41 | TGGATGACTACAAAGTTTCAGCA  | CATGTGTTCCAGGTGATGAGATA    | ATAA(5)       | 131 | Yes |
| PcSSR42 | GCCCTAGCTGACTCTACCAAATC  | TTTGATAGGGAGGCAAACAAATA    | ATC(6)        | 135 | Yes |
| PcSSR43 | AAAGCAATGAAGCAGAGTTCATC  | CTGAGAATGATTGGGGTTTTTC     | ATC(8)        | 124 | Yes |
| PcSSR44 | TCTACTGAGGTTGGGAATCAGAC  | TTGCAACAAATATTACTCCGCT     | ATG(6)        | 130 | Yes |
| PcSSR45 | ACAACAACTTCAAATGTCGATGA  | AAGAACAGAGGATATCCCATTGA    | ATGGGA(4<br>) | 148 | Yes |
| PcSSR46 | ATTGAAAACCTCAAATTGTCCCAA | ATTGGACTTGATGGTTGCACTAC    | ATT(6)        | 143 | Yes |
| PcSSR47 | GACTTTATTGAGCCCCTTCAAAT  | GGGATCTATGTCATATTCATCTCTCA | ATTT(5)       | 139 | Yes |
| PcSSR48 | GCCATTTAACCCAAAGGAGTAAG  | AGGCTAAGCGGAATTAGGTTTTA    | CA(19)        | 152 | Yes |
| PcSSR49 | AAGAACATCTACAAGAGGGGGTC  | CTAGTCTCTGTGGAGGGCCTAT     | CA(8)         | 154 | Yes |
| PcSSR50 | AAACCTGAAGGTGTGTTGAAGAA  | TGAAGAACAAAAAGACAAAGTTGA   | CAAA(5)       | 143 | Yes |
| PcSSR51 | CACCACACATCCTGAATAACCAT  | GTA TAGCACTGATCAAGGTGGC    | CAC(6)        | 154 | Yes |
| PcSSR52 | TCACCTCCACCAACAACACTAC   | CATTGATGATGACCACGTATCAG    | CAC(8)        | 151 | Yes |
| PcSSR53 | GGCTCAAACCTCAGTCACACCTAC | ATTGTGACATAGCAGAGACAGCA    | CAG(7)        | 158 | Yes |
| PcSSR54 | AAAACCACCTAACATTTACCAA   | TATGTGAAGAAGATGACGAGCAA    | CAT(6)        | 118 | Yes |
| PcSSR55 | TTCCCCTTCACTTTCTCACATAA  | AGCGTCATTTGGAAGAATCAAT     | CATTCT(4)     | 145 | Yes |
| PcSSR56 | TTATCCTCTGAATCACCAGAAC   | CAGTCTGTAGAGGGTATGCTTCG    | CCA(7)        | 138 | Yes |
| PcSSR57 | GAATGGTAAGAGTAGTGATGGCG  | TATCCTGGTAAAACCGATGAACA    | CCAGCT(4<br>) | 153 | Yes |
| PcSSR58 | GTAGTTGCAATTTCCCCTTCTTG  | ATACAAAAGAAAGCAATGGCGTA    | CCT(6)        | 155 | Yes |
| PcSSR59 | ACCCGTTTACCCTAATACAGCTC  | ACTTGTGTCTCTCTTCAGAAACG    | CCTTCT(4)     | 158 | Yes |
| PcSSR60 | TTCAAACCCAGATAGCGAACTTA  | AAGGAAGTCTCCACCGTATTCTC    | CGGTGG(4<br>) | 136 | Yes |
| PcSSR61 | TAGAAACAGTCCACCTCGAAAAA  | CAGCAGGAGTTGGATTTGTAGTT    | CT(11)        | 146 | Yes |
| PcSSR62 | ACATTCTCAGTTTCCCAACAGAA  | CATAGAAAACACCGTCATCATCA    | CT(13)        | 113 | Yes |
| PcSSR63 | CTCACACCAAACAGTCCCTAAAC  | GATATTGCGGGAGAGTAGATGG     | CT(8)         | 160 | Yes |
| PcSSR64 | TCACTACCTTGGTTCAGTCCATT  | CGTTCAACGAGCTGAGTTACAG     | CT(9)         | 138 | Yes |
| PcSSR65 | TCAAACCTCTTCTTCTTCCTTC   | TCAGATTCTCTCTTGGGTTTGTT    | CTC(7)        | 145 | Yes |
| PcSSR66 | AAAATCCAATGGAGAATACCCAG  | CTGTTGAAGGAGATGGTGAAAAG    | CTG(6)        | 113 | Yes |
| PcSSR67 | TGCTTCTAGGGCATGTTCTTTAG  | AATTCAATATGGAGTTGGAGTGC    | CTT(6)        | 149 | Yes |
| PcSSR68 | CTGCAGGTTATTGCATTAGGTTT  | GAGTTATTTGAGCATGTGGTTCC    | CTT(6)        | 155 | Yes |
| PcSSR69 | AGATCTTCTGTGTGAACCCCTG   | TAAACGAGGCTTCTTCTTCTCC     | CTT(7)        | 142 | Yes |
| PcSSR70 | GCTCTTTATCATCAATCTAGGGC  | AACAGGCTTTATTGTTGGTGTTG    | CTT(8)        | 128 | Yes |
| PcSSR71 | AGCTCCCCCTAATCTAGCTTTCT  | GTTGTGTGTTTTTGTCCCTCTT     | GA(10)        | 121 | Yes |
| PcSSR72 | GCTCTTTCAACTGTGCATTCTTT  | TCCAGGTTCTCTCTTTTATCCC     | GA(12)        | 151 | Yes |
| PcSSR73 | AGCTAGCAAATGAGACACCTGAC  | TCTCTCACTTTTGCTCTTGCTCT    | GA(8)         | 119 | Yes |
| PcSSR74 | ATGTGAAGGGGAGAAAGAAAAAG  | ATTCAATTGTAGGCTTGGGAAAT    | GA(8)         | 122 | Yes |
| PcSSR75 | AATAAGCAGAGCGGGAATAAAAG  | TTTGCTCATGTACTTCTCTCTTTG   | GA(9)         | 114 | Yes |
| PcSSR76 | GCTCAGAACTTTAACCAACCAGA  | ACTTTTCTTTTTCACTTGGGC      | GAA(6)        | 142 | Yes |
| PcSSR77 | AGAAAGAATCAAATCTGGCACTG  | CATCTTCTTCTTGATGTTCCG      | GAA(6)        | 155 | Yes |
| PcSSR78 | TCAAAGTCGTAAAATGAAAGGGA  | ATCTTCCAACCCCTTACACACT     | GAA(7)        | 113 | Yes |

|          |                            |                          |               |     |     |
|----------|----------------------------|--------------------------|---------------|-----|-----|
| PcSSR79  | AAGACATGATTTCATTGCTGGAGT   | GATGAACTGAAAACAGCAACACC  | GAA(8)        | 153 | Yes |
| PcSSR80  | TGATTGATGTTGTAAGCTATTTGG   | TGGCCAGAAAACAAAAAGTAAGA  | GAAA(5)       | 120 | Yes |
| PcSSR81  | TGGGAACGTTAAGGAGATACAAA    | GGAGATAAGGAAAGGTAGAGCGA  | GAAGAT(4<br>) | 146 | Yes |
| PcSSR82  | GACTTAGAGTTTGCGTTCAAGA     | ACTCTCCTCTTCCACTTCCACTT  | GAG(7)        | 150 | Yes |
| PcSSR83  | AAAAGAAAGGAGGGAGGGACTAA    | CCCGCTCTCTGATTTTATTCTTC  | GAT(7)        | 141 | Yes |
| PcSSR84  | GGGACGGAATCAGATAACTCTT     | TGAGGTTCCACTACTCTTGAGAGA | GAT(8)        | 145 | Yes |
| PcSSR85  | AAAAAGAAATCAGCTCCGAAATC    | ACCTTTGAATCTAATCACGACGA  | GATCT(4)      | 105 | Yes |
| PcSSR86  | CTGAACTAACTGCACATCCACA     | GTGAATGAATCATCAAACAGCAA  | GCA(8)        | 100 | Yes |
| PcSSR87  | CATCCTGTAAATTTATGCTGCTTG   | TGAATATAGCCATTTTCTTTTAGC | GCTAA(4)      | 160 | Yes |
| PcSSR88  | GGAAAGGAATATAAGGGAAAGGA    | AGAAGGTGACTGGAATCTTCACC  | GGAAAG(5<br>) | 152 | Yes |
| PcSSR89  | GTGGGATTGAACCTGACTTTGTA    | GTCCTCCCAATTCTTCTACTGCT  | GGAGGT(4<br>) | 150 | Yes |
| PcSSR90  | GAGGAGCTAAAAGAAGAAGGGTG    | CTTCAAGTTAATAGAGCCCCTGC  | GGGAAG(4<br>) | 156 | Yes |
| PcSSR91  | TTGATTGATTCACAGGAAAAGGT    | GAGGAGAGTCATGTGGTATGTCC  | GGT(6)        | 144 | Yes |
| PcSSR92  | ATTGTTTGAATAAGGTGGAGGTG    | GTAAGGTGGAATCTTTAAAGCCG  | GGTGA(4<br>)  | 155 | Yes |
| PcSSR93  | TTCTTGAAGGAGCTCCAGAAGTT    | CTCCACAACATCCTCCTCATC    | GTG(6)        | 131 | Yes |
| PcSSR94  | TTCATCTGACAGAAAACCCAAAT    | TTCATCCCAGTCTATACCCGATA  | GTG(6)        | 158 | Yes |
| PcSSR95  | TCAAAATTCAGGTTCACTCCACT    | CAAACACCTTCATCACACTACCA  | GTT(7)        | 149 | Yes |
| PcSSR96  | TTTTCATGGATTGATGTGAACTG    | ACCGTCAATCACAATCTTGTTTC  | GTTTA(4)      | 156 | Yes |
| PcSSR97  | GATGCCATGAACTTCCACTCTTA    | TGTTACATGCGAGAGAAACTGAA  | T(31)         | 157 | Yes |
| PcSSR98  | TGTAACCTGTCTCAAGGGTGCTT    | CATAGTGGTCTACTGGGTCACA   | TA(10)        | 121 | Yes |
| PcSSR99  | TGCTGATTCTTTACTGTCCATGA    | AACATTTCTGTGACAAATGGACT  | TA(11)        | 148 | Yes |
| PcSSR100 | TCACAAAAGAAAAAGAAAAACGC    | TCACAAAAGAAAAAGAAAAACGC  | TA(12)        | 148 | No  |
| PcSSR101 | GAATACGAGATTGGCATCACACT    | CCTTGAGTCAAAAGGCTGTAAAGA | TA(8)         | 142 | No  |
| PcSSR102 | AAACAGACCCCATTTTCTTTCTT    | CTTGGTCATGTAGGGTTAGCAAG  | TA(8)         | 152 | Yes |
| PcSSR103 | GTAAAAATCCATAACCATTTGCCA   | AACATTTGTCTAGAAGCATTTTCC | TA(8)         | 157 | Yes |
| PcSSR104 | CACAAATAAACGAGCTTTACGGA    | CACTCTGCCGTTGATAAAGTTTC  | TA(9)         | 133 | No  |
| PcSSR105 | CAGATCACATTACCCAGATCACA    | TAGTGAATCAATGAACTGGGGC   | TA(9)         | 142 | No  |
| PcSSR106 | TTCCATTGATGTACCCATGAACT    | TTTTTGACATCACAAGTACTCG   | TAA(6)        | 160 | Yes |
| PcSSR107 | TGAAAAGAGGAATAAGAGTAATGCAA | TGAAGACAAGAAGAGGAGAGGTG  | TAAA(5)       | 154 | No  |
| PcSSR108 | CTCGGTTTCTTCTCTGGATTTTT    | GGAGCTTCGTAAAAACAAGGATTT | TAG(7)        | 126 | No  |
| PcSSR109 | GGCTTTATCCATTTGTCTCCATT    | TTGCTTGTTTACGTGTTCAATTG  | TAT(6)        | 111 | Yes |
| PcSSR110 | CTCTTACATCCATCATCCTCCTG    | GAAATGGAGATGGCATTTGATTA  | TATT(5)       | 145 | Yes |
| PcSSR111 | GACTTCGAATTAGAGCCAATCAA    | GATTAGATGGCAACACAGAGAGA  | TC(10)        | 94  | Yes |
| PcSSR112 | TCCAATCCCAGTCTTCTAGACCT    | ACTGATGCCTAAAGGAGCACATA  | TC(10)        | 157 | Yes |
| PcSSR113 | TTCCCCCTATAACATTTCAAACA    | AACATCAAACGAAAGAGCAGAAA  | TC(12)        | 120 | Yes |
| PcSSR114 | GTCCTTTTCTCATTTATGGGATT    | CTCAGAAGCGATTCTACGTCTA   | TC(17)        | 140 | Yes |
| PcSSR115 | ACCATGAGAACGAAAACCTAAT     | CCATATTATCCAACCAGAAAATGA | TC(8)         | 145 | Yes |
| PcSSR116 | CAAAGAAGCCAACAAAGAAGGTA    | AAACAAAAGAAAAACGGAAAAAGA | TC(8)         | 102 | Yes |
| PcSSR117 | TCAATTCAAATTGGTCTCTGCTT    | TATGGAGGTATGGTATGGTGTCC  | TC(9)         | 147 | No  |

|          |                         |                            |               |     |     |
|----------|-------------------------|----------------------------|---------------|-----|-----|
| PcSSR118 | TATTGGTTTCAAAATCACAAGGC | CGTCTTTCCTGTCAATGATTCT     | TCA(7)        | 142 | Yes |
| PcSSR119 | TCTCAACAGAAACACCATGTCAG | AGAAGACTTTTGGGTTTGGTAGC    | TCACAA(4<br>) | 150 | Yes |
| PcSSR120 | CAACATCAAGCTCATTCTCCTCT | GCTGTTCTTGATCTTCATTGCT     | TCC(6)        | 158 | Yes |
| PcSSR121 | GACCATCATAAGAACCCTGAACA | CGGATTGGATTCTGAGAGTAATG    | TCCCTA(4)     | 152 | Yes |
| PcSSR122 | TCCTCATCTGAAGCTCCTAACAC | CACAAAACCACACATCATAATCG    | TCT(6)        | 156 | Yes |
| PcSSR123 | GCATTGCAAACCATTAAGAT    | AGGTGAATGCTGAAGACAGAGAA    | TCT(6)        | 123 | Yes |
| PcSSR124 | ATCAAATACCCTTTCAAGCCTTC | ACTGGATCAGGTGATGGAGTAGA    | TCT(7)        | 113 | Yes |
| PcSSR125 | TTGCGCAAACATAAAGCTC     | TCTGAGAGGTAGATTCTGCATGG    | TCT(8)        | 122 | Yes |
| PcSSR126 | ACCCCAATTAATCAGATCAC    | ATGGAATGTTTGATTTGCCTAA     | TCTGAC(4)     | 159 | Yes |
| PcSSR127 | AATTCAATGATGTTGAAAGGAA  | TGATATCACTAAATCAAACCCAAAA  | TG(10)        | 106 | Yes |
| PcSSR128 | AAAGCTAAATCCTTCAATGCCTC | AATTTCAAATGGGCAAATTCTTT    | TG(8)         | 158 | Yes |
| PcSSR129 | CCGTAATCCGAGAAGGTAAAAAT | CCCATCTACATGTTCAACACAGA    | TG(9)         | 150 | Yes |
| PcSSR130 | GGATCTGCGTTCAAGAAACATAC | CATGGCAGACTGTACTCTTGATG    | TGA(7)        | 151 | Yes |
| PcSSR131 | CAACACAATCTTCCCTTCATTTT | AGAGTGTTTGTGTTTGTGCTTCA    | TGA(9)        | 160 | Yes |
| PcSSR132 | TTCTCTCTTCTGCTTCTTCTT   | TCTCAGTTCTTGAAAAATGGCTC    | TGC(6)        | 132 | Yes |
| PcSSR133 | AGCAGGGAGATGGTAGGAGTAGT | CTAACAACAGCGCCAATCTTATC    | TGG(6)        | 160 | Yes |
| PcSSR134 | TTGATTCCATTTCTCCACTTTGT | AAAGGTCGAATTCTGATTGATT     | TGG(7)        | 148 | Yes |
| PcSSR135 | CTTCTTGCATCTAGCACCAAGTT | TCAAAAAATAGAAACAGACGACAGG  | TGGATC(4<br>) | 100 | Yes |
| PcSSR136 | TTGTTTTCTCCGAAGTGGTTAAA | AAACAACAAATAAAACAAAGAAGCG  | TGT(7)        | 137 | Yes |
| PcSSR137 | GTTTTTCTTTCTTCTTGATGC   | TAAGGGTTCGTTTCATTTGTGTTT   | TTA(6)        | 157 | Yes |
| PcSSR138 | ATGGACATTCAAATCGCATAGAC | ATCGTTGCTCTACGATCTCTACG    | TTC(11)       | 120 | No  |
| PcSSR139 | TCCAGAGAAAAATGGGATGATTA | AACGCAAGTCAAAGTGCTAAAAG    | TTC(6)        | 138 | Yes |
| PcSSR140 | AGTCTACCATTCGAATCCCGAGT | AATCCTCACACTGCAGCAGATAG    | TTC(6)        | 141 | Yes |
| PcSSR141 | AACCAACTAAATGCACTCCAAAA | TATCGTCTTCCAGCTCAAACTC     | TTC(6)        | 114 | Yes |
| PcSSR142 | AATTGACTCCACCAAGTTTGAA  | AGGAGCAAAATTAAGGAGGAGAA    | TTC(6)        | 158 | Yes |
| PcSSR143 | CCACCTGCCATCTGTAACTTTT  | CTTCAACAAGAGGTTGAACGTAGG   | TTC(8)        | 159 | Yes |
| PcSSR144 | ATCACACAAGAGGGAGTGAATGT | TCCAATGGCTTAATAGGAACAAA    | TTCT(5)       | 136 | Yes |
| PcSSR145 | CAGTGGAAGTGTTCAGAGTTT   | GAGAACTACAATGTTTTCGGAC     | TTG(6)        | 160 | Yes |
| PcSSR146 | CTCTAGAGTTCGGAACAGCGTC  | GATTCCATGAGGAAGAGTGTGAG    | TTG(7)        | 160 | Yes |
| PcSSR147 | TGAAGACAAGAAGAGGAGAGGTG | TGAAAAGAGGAATAAGAGTAATGCAA | TTTA(5)       | 154 | No  |
| PcSSR148 | TGACCTCGTTATGACAAAATTCA | TGAAGTAGTTTCTTATTCGCCCC    | TTTA(6)       | 148 | Yes |
| PcSSR149 | AGGCTTAACCCACTTCTGTCTT  | ACCTTGTTTGAGCAGGTTTACA     | TTTC(5)       | 160 | Yes |
| PcSSR150 | AACACTCCAACCGCAGATATTTA | CCAGCAACTTTGCATAGAGATTA    | TTTCTC(4)     | 158 | Yes |
| PcSSR151 | GGGTTTTCATGTTAATCATTTT  | CCCTTCTCTCTTCAGAACCCTA     | TTTTTC(4)     | 136 | Yes |
