# Supplementary material for: Transcriptome Analysis and Identification of a Female-Specific SSR Marker in Pistacia chinensis Based on Illumina Paired-End RNA Sequencing
Source: MDPI journal article supplement (doi:10.3390/genes13061024), 2022-06-07
Supplement: s1 [file s1]

**Table S1** Size distribution of SSR markers according to the number of repeaters.

| Number of repeats | 4   | 5    | 6    | 7    | 8   | 9   | 10  | 11  | 12   | 13   | 14   | 15  | 16  | 17  | 18  | 19  | ≥20  | Total         |
|-------------------|-----|------|------|------|-----|-----|-----|-----|------|------|------|-----|-----|-----|-----|-----|------|---------------|
| Mono-             | 0   | 0    | 0    | 0    | 0   | 0   | 0   | 0   | 1680 | 1275 | 1024 | 948 | 838 | 725 | 634 | 520 | 3749 | 11393(52.59%) |
| Di-               | 0   | 0    | 1667 | 818  | 684 | 441 | 364 | 286 | 194  | 38   | 53   | 47  | 58  | 44  | 34  | 30  | 70   | 4829(22.29%)  |
| AC/GT             | 0   | 0    | 168  | 101  | 51  | 36  | 43  | 27  | 22   | 3    | 1    | 3   | 2   | 6   | 1   | 3   | 13   | 480(2.22%)    |
| AG/CT             | 0   | 0    | 977  | 481  | 426 | 277 | 250 | 194 | 135  | 17   | 47   | 32  | 50  | 37  | 26  | 26  | 52   | 3027(13.97%)  |
| AT/TA             | 0   | 0    | 522  | 236  | 207 | 128 | 71  | 65  | 37   | 18   | 5    | 12  | 6   | 1   | 7   | 1   | 5    | 1321(6.09%)   |
| GC/CG             | 0   | 0    | 0    | 0    | 0   | 0   | 0   | 0   | 0    | 0    | 0    | 0   | 0   | 0   | 0   | 0   | 0    | 1             |
| Tri-              | 0   | 2429 | 972  | 531  | 273 | 42  | 47  | 25  | 9    | 5    | 10   | 3   | 9   | 4   | 0   | 1   | 4    | 4364(20.15%)  |
| AAC/GTT           | 0   | 248  | 78   | 46   | 16  | 3   | 0   | 0   | 0    | 0    | 0    | 0   | 0   | 0   | 0   | 1   | 0    | 392           |
| AAG/CTT           | 0   | 752  | 338  | 174  | 102 | 22  | 33  | 15  | 5    | 4    | 8    | 3   | 4   | 2   | 0   | 0   | 0    | 1462(6.75%)   |
| AAT/ATT           | 0   | 323  | 165  | 89   | 44  | 1   | 3   | 2   | 0    | 0    | 0    | 0   | 0   | 2   | 0   | 0   | 0    | 629(2.90%)    |
| ACC/GGT           | 0   | 347  | 110  | 62   | 28  | 2   | 8   | 3   | 4    | 1    | 0    | 0   | 1   | 0   | 0   | 0   | 0    | 566(2.61%)    |
| ACG/CGT           | 0   | 48   | 15   | 8    | 0   | 0   | 0   | 0   | 0    | 0    | 0    | 0   | 0   | 0   | 0   | 0   | 0    | 71            |
| ACT/AGT           | 0   | 66   | 17   | 10   | 3   | 2   | 0   | 0   | 0    | 0    | 0    | 0   | 0   | 0   | 0   | 0   | 0    | 98            |
| AGC/GCT           | 0   | 181  | 46   | 6    | 12  | 2   | 0   | 0   | 0    | 0    | 0    | 0   | 0   | 0   | 0   | 0   | 0    | 247           |
| AGG/CCT           | 0   | 135  | 84   | 48   | 22  | 3   | 2   | 2   | 0    | 0    | 0    | 0   | 0   | 0   | 0   | 0   | 0    | 296           |
| ATC/GAT           | 0   | 282  | 108  | 85   | 45  | 7   | 1   | 3   | 0    | 0    | 2    | 0   | 4   | 0   | 0   | 0   | 4    | 541           |
| CCG/CGG           | 0   | 47   | 11   | 3    | 1   | 0   | 0   | 0   | 0    | 0    | 0    | 0   | 0   | 0   | 0   | 0   | 0    | 62            |
| Tetra-            | 0   | 193  | 55   | 3    | 1   | 1   | 2   | 0   | 0    | 0    | 0    | 0   | 0   | 0   | 0   | 0   | 0    | 255(1.18%)    |
| Petra-            | 275 | 37   | 10   | 2    | 3   | 0   | 0   | 0   | 0    | 0    | 0    | 0   | 1   | 0   | 0   | 0   | 0    | 328(1.51%)    |
| Hexa-             | 414 | 28   | 29   | 2    | 5   | 0   | 1   | 2   | 1    | 2    | 0    | 1   | 3   | 0   | 0   | 0   | 5    | 493(2.28%)    |
| Total             | 689 | 2687 | 2733 | 1356 | 966 | 484 | 414 | 313 | 1884 | 1320 | 1087 | 999 | 909 | 773 | 668 | 551 | 3828 | 21662         |
